# Supplementary material for: Enhancing the Anaerobic Biodegradation of Petroleum Hydrocarbons in Soils with Electrically Conductive Materials
Source: MDPI journal article supplement (doi:10.3390/bioengineering10040441), 2023-04-01
Supplement: s1 [file s1]

# Enhancing the anaerobic biodegradation of petroleum hydrocarbons in soils with electrically conductive materials

## Supporting information

Carolina Cruz Viggi<sup>1,\*</sup>, Matteo Tucci<sup>1</sup>, Marco Resitano<sup>1</sup>, Valentina Palushi<sup>1</sup>, Simona Crognale<sup>1,3</sup>, Bruna Matturro<sup>1,3</sup>, Marco Petrangeli Papini<sup>2</sup>, Simona Rossetti<sup>1</sup> and Federico Aulenta<sup>1,3</sup>

<sup>1</sup> Water Research Institute (IRSA), National Research Council (CNR), Via Salaria km 29300, 00015 Monterotondo (RM), Italy

<sup>2</sup> Department of Chemistry, Sapienza University of Rome, 00185 Rome, Italy

<sup>3</sup> National Biodiversity Future Center, Palermo 90133, Italy

\* Correspondence: carolina.cruzviggi@irsa.cnr.it

**Table S1.** – Composition of the mineral medium used for the study.

| Minerals                              |                      |
|---------------------------------------|----------------------|
| Compound                              | Concentration (g/L)  |
| NH <sub>4</sub> Cl                    | 0.5                  |
| MgCl <sub>2</sub> × 6H <sub>2</sub> O | 0.1                  |
| CaCl <sub>2</sub> × 2H <sub>2</sub> O | 0.05                 |
| K <sub>2</sub> HPO <sub>4</sub>       | 0.4                  |
| Trace metals                          |                      |
| Compound                              | Concentration (mg/L) |
| Nitrilotriacetic acid                 | 4.5                  |
| FeSO <sub>4</sub> × 7H <sub>2</sub> O | 0.556                |
| MnSO <sub>4</sub> × H <sub>2</sub> O  | 0.086                |
| CoCl <sub>2</sub> × 6H <sub>2</sub> O | 0.17                 |
| ZnSO <sub>4</sub> × 7H <sub>2</sub> O | 0.21                 |
| H <sub>3</sub> BO <sub>3</sub>        | 0.019                |
| NiCl <sub>2</sub>                     | 0.02                 |
| Na <sub>2</sub> MoO <sub>4</sub>      | 0.01                 |
| Vitamins                              |                      |
| Compound                              | Concentration (mg/L) |
| Biotin (B7)                           | 0.02                 |
| Folic acid (B9)                       | 0.02                 |
| Pyridoxine (B6)                       | 0.1                  |
| Thiamine (B1)                         | 0.05                 |
| Riboflavin (B2)                       | 0.05                 |
| Nicotinic acid (B3)                   | 0.05                 |
| Pantothenic acid (B5)                 | 0.05                 |
| Cyanocobalamin (B12)                  | 0.002                |
| 4-aminobenzoic acid (B10)             | 0.05                 |

**Table S2.** Set of primers used for qPCR.

| Gene name   | Primers ID | Primer sequences (5'-3')   | Reference |
|-------------|------------|----------------------------|-----------|
| <b>assA</b> | assA2F     | YATGWACTGGCACGGMCA         | [33]      |
|             | assA2R     | GCRTTTTCMACCCAKGTA         |           |
| <b>bssA</b> | 7772f      | GACATGACCGACGCSATYCT       | [36]      |
|             | 8546r      | TCGTCGTCRTTGCCCCAYTT       |           |
| <b>bcrC</b> | bcrCf      | CGHATYCCRCGSTCGAC-CATCG    | [34]      |
|             | bcrCr      | CGGATCGGCTGCATCTGGCC       |           |
| <b>bzdN</b> | bzdNf      | GAGCCGCACATCTTCGGCAT       | [34]      |
|             | bzdNr      | TRTGVRCCG-GRTARTCCTTSGTCCG |           |
| <b>bamB</b> | bamBf      | ATGMGGTAYGSAGARACHGG       | [35]      |
|             | bamBr      | CCSGCRWRYTTCADYTCCG        |           |

### 1. GC-TCD analyses of the gas phase

50 µL of gaseous samples were injected in a gas-chromatograph equipped with a thermal conductivity detector (TCD, Agilent 8860, GC system USA); column: Agilent Carboxen 1000 stainless steel packed (3.05 m × 0.32 cm, OD, 2 mm ID, Carboxen-1000 packing, mesh size 60/80, pre-conditioned); carrier gas: Nitrogen 10 mL/min; Injection Temp: 200 °C; Interface Temp: 300 °C; Oven Temp Program: 100°C for 10.0 min.

### 2. GC-MS parameters for the TPH analysis of the extracts

The extract (1 µL) was injected (in pulsed split-less mode) into a GC-MS (Perkin Elmer Clarus 680/600; column: HP-5 MS (Agilent) 30 m, ID 0.25 mm, 0.25 mm film thickness; carrier gas: helium 1 mL/min; Inj T: 310 °C; Interface T: 280 °C; Oven T Program: 50 °C for 0.0 min, then 20 °C/min to 100 °C, then 5 °C/min to 300 °C, then 300 °C for 2.5 min. MS method: Full Scan mode, mass range 35–650 m/z)

### 3. GC-MS parameters for the PAHs analysis of the extracts

The extract (1 µL) was injected (in pulsed split-less mode) into a GC-MS (Perkin Elmer Clarus 680/600; column: HP-5 MS (Agilent) 30 m, ID 0.25 mm, 0.25 mm film thickness; carrier gas: helium 1 mL/min; Inj T: 310 °C; Interface T: 280 °C; Oven T Program: 50 °C for 0.0 min, then 20 °C/min to 100 °C, then 5 °C/min to 300 °C, then 300 °C for 2.5 min. MS method: Selected Ion Monitoring (m/z: 78, 91, 128, 152, 154, 166, 178, 202, 228, 252, 276, 278).

## REFERENCES

33. Aitken, C.; Jones, D.; Maguire, M.; Gray, N.; Sherry, A.; Bowler, B.; Ditchfield, A.; Larter, S.; Head, I. Evidence that crude oil alkane activation proceeds by different mechanisms under sulfate-reducing and methanogenic conditions. *Geochim. Cosmochim. Acta* **2013**, *109*, 162–174. <https://doi.org/10.1016/j.gca.2013.01.031>.
34. Kuntze, K.; Vogt, C.; Richnow, H.-H.; Boll, M. Combined Application of PCR-Based Functional Assays for the Detection of Aromatic-Compound-Degrading Anaerobes. *Appl. Environ. Microbiol.* **2011**, *77*, 5056–5061. <https://doi.org/10.1128/aem.00335-11>.
35. Löffler, C.; Kuntze, K.; Vazquez, J.R.; Rugor, A.; Kung, J.W.; Böttcher, A.; Boll, M. Occurrence, genes and expression of the W/Se-containing class II benzoyl-coenzyme A reductases in anaerobic bacteria. *Environ. Microbiol.* **2010**, *13*, 696–709. <https://doi.org/10.1111/j.1462-2920.2010.02374.x>.
36. Winderl, C.; Schaefer, S.; Lueders, T. Detection of anaerobic toluene and hydrocarbon degraders in contaminated aquifers using benzylsuccinate synthase (bssA) genes as a functional marker. *Environ. Microbiol.* **2007**, *9*, 1035–1046. <https://doi.org/10.1111/j.1462-2920.2006.01230.x>.
